# Supplementary material for: The Structure of Treponema pallidum Tp0751 (Pallilysin) Reveals a Non-canonical Lipocalin Fold That Mediates Adhesion to Extracellular Matrix Components and Interactions with Host Cells
Source: PubMed Central journal article supplement (PMC5040251; doi:10.1371/journal.ppat.1005919), 2016-09-28

**S2 Fig. PCR screening of Tp0751-expressing *B. burgdorferi*.**

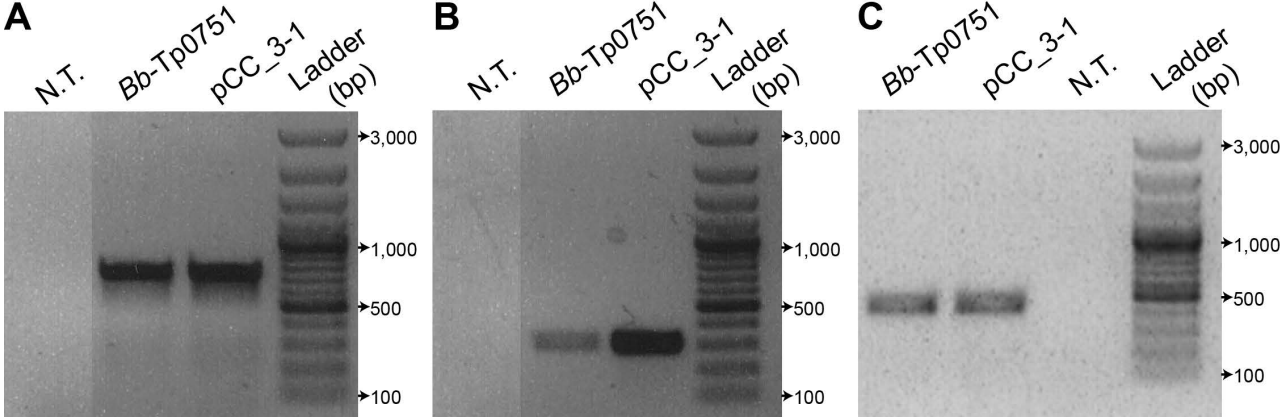

Supplement: ppat.1005919.s002.pdf [file ppat.1005919.s002.pdf]
