# Supplementary material for: The Structure of Treponema pallidum Tp0751 (Pallilysin) Reveals a Non-canonical Lipocalin Fold That Mediates Adhesion to Extracellular Matrix Components and Interactions with Host Cells
Source: PubMed Central journal article supplement (PMC5040251; doi:10.1371/journal.ppat.1005919), 2016-09-28

**S3 Fig. Copy numbers of Tp0751 mRNA, as measured by digital PCR.**

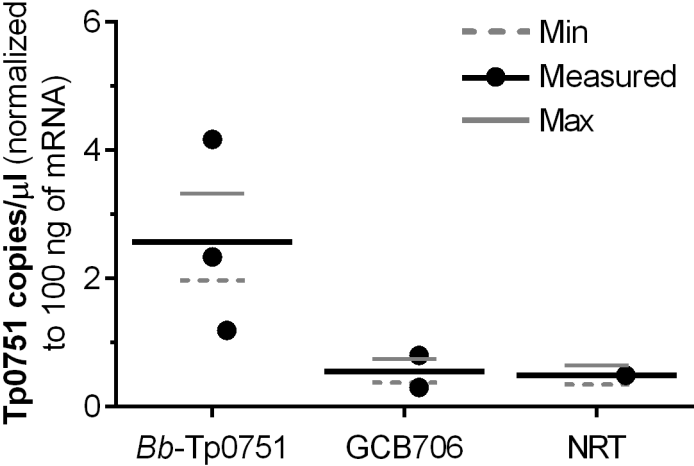

Supplement: ppat.1005919.s003.pdf [file ppat.1005919.s003.pdf]
