# Supplementary material for: The Structure of Treponema pallidum Tp0751 (Pallilysin) Reveals a Non-canonical Lipocalin Fold That Mediates Adhesion to Extracellular Matrix Components and Interactions with Host Cells
Source: PubMed Central journal article supplement (PMC5040251; doi:10.1371/journal.ppat.1005919), 2016-09-28
Supplement: ppat.1005919.s006.pdf [file ppat.1005919.s006.pdf]

**S3 Table. Primers**

| <b>Primer</b>    | <b>Target</b>                                                                                            | <b>Sequence (5'-3')</b>                                     |
|------------------|----------------------------------------------------------------------------------------------------------|-------------------------------------------------------------|
| B1723 (P1)       | 5' end of <i>PflaB</i> (with <i>XhoI</i> site) (forward primer)                                          | CTCGAGTGTCTGTCGCCCTCTGTGG                                   |
| B1662            | 3' end of <i>PflaB</i> fused to 5' end of <i>bbk32</i> coding sequence (reverse primer)                  | CAAATATTTACTTTTAACTTTTTTCA<br>TTCATTCCTCCATGATAAAAATTTAA    |
| B1663            | 3' end of <i>PflaB</i> fused to 5' end of <i>bbk32</i> coding sequence (forward primer)                  | TTAAATTTTATCATGGAGGAATGAA<br>TGAAAAAAGTTAAAAGTAAATATTT<br>G |
| B1727            | 3' end of <i>bbk32</i> coding sequence fused to 5' end of <i>3XFLAG</i> coding sequence (reverse primer) | CCGTCATGGTCTTTGTAGTCGTACC<br>AAACGCCATTCTTGTC               |
| B1726            | 3' end of <i>bbk32</i> coding sequence fused to 5' end of <i>3XFLAG</i> coding sequence (forward primer) | GACAAGAATGGCGTTTGGTACGACT<br>ACAAAGACCATGACGG               |
| B1724 (P9)       | 3' end of <i>3XFLAG</i> coding sequence (with <i>NotI</i> site) (reverse primer)                         | GCGGCCGCCTACTTGTGCATCGTCAT<br>CCTTGTA                       |
| P2               | 3' end of <i>PflaB</i> fused to 5' end of <i>tp0751</i> coding sequence (forward primer)                 | TTAAATTTTATCATGGAGGAATGAG<br>TGAATAGACCTTTACTGAGTG          |
| P3               | 3' end of <i>PflaB</i> fused to 5' end of <i>tp0751</i> coding sequence (reverse primer)                 | CACTCAGTAAAGGTCTATTCACTCA<br>TTCCTCCATGATAAAAATTTAA         |
| P7               | 3' end of <i>tp0751</i> coding sequence fused to 5' end of <i>3XFLAG</i> (forward primer)                | GCTAGTGCTCCTTCGCCGACTACA<br>AAGACCATGACGG                   |
| P8               | 3' end of <i>tp0751</i> coding sequence fused to 5' end of <i>3XFLAG</i> (reverse primer)                | CCGTCATGGTCTTTGTAGTCGGGCG<br>AAGGAGCACTAGC                  |
| B70              | Forward primer: screening for <i>kan<sup>R</sup></i> gene                                                | CATATGAGCCATATTCAACGGGAAA<br>CG                             |
| B71              | Reverse primer: screening for <i>kan<sup>R</sup></i> gene                                                | AAAGCCGTTTCTGTAATGAAGGAG                                    |
| B348             | Forward primer: screening for <i>gent<sup>R</sup></i> gene                                               | CGCAGCAGCAACGATGTTAC                                        |
| B349             | Reverse primer: screening for <i>gent<sup>R</sup></i> gene                                               | CTTGCACGTAGATCACATAAGC                                      |
| pJETSEQF         | Forward primer for pJET1.2 insert sequencing                                                             | CRACTCACTATAGGGAGAGCGGC                                     |
| pJETSEQR         | Reverse primer for pJET1.2 insert sequencing                                                             | AAGAACATCGATTTCCATGGCAG                                     |
| F_Xho_Pfla_short | Forward primer for <i>Bb</i> -Tp0751 construct sequencing                                                | CTCGAGTGTCTGTCGCCCTC                                        |
| Bb-751_int_R     | Reverse primer for <i>Bb</i> -Tp0751 construct sequencing                                                | CCGTGCTACGTCTTCAACCG                                        |
| qTp0751FI        | Forward primer for digital PCR ( <i>Bb</i> -Tp0751)                                                      | GTCTGACACGGCAGACAATA                                        |
| qTp0751RI        | Reverse primer for digital PCR ( <i>Bb</i> -Tp0751)                                                      | GTTGTGTGTGTGTCTGTGCT                                        |
