# Supplementary material for: The Structure of Treponema pallidum Tp0751 (Pallilysin) Reveals a Non-canonical Lipocalin Fold That Mediates Adhesion to Extracellular Matrix Components and Interactions with Host Cells
Source: PubMed Central journal article supplement (PMC5040251; doi:10.1371/journal.ppat.1005919), 2016-09-28
Supplement: ppat.1005919.s008.pdf [file ppat.1005919.s008.pdf]

**S5 Table. Bacterial length of individual *B. burgdorferi* strains**

| <b>Strain</b>            | <b>Bacterial length (<math>\mu\text{m}</math>) <math>\pm</math>SEM</b> |
|--------------------------|------------------------------------------------------------------------|
| Parent GCB706            | 16.34 $\pm$ 4.068                                                      |
| Parent+BBK32 (TMB103)    | 18.09 $\pm$ 3.597                                                      |
| Parent+Tp-Tp0751 (TMB49) | 17.52 $\pm$ 4.498                                                      |
